# Supplementary material for: Calcium-Binding Capacity of Centrin2 Is Required for Linear POC5 Assembly but Not for Nucleotide Excision Repair
Source: PubMed Central journal article supplement (PMC3699651; doi:10.1371/journal.pone.0068487), 2013-07-02

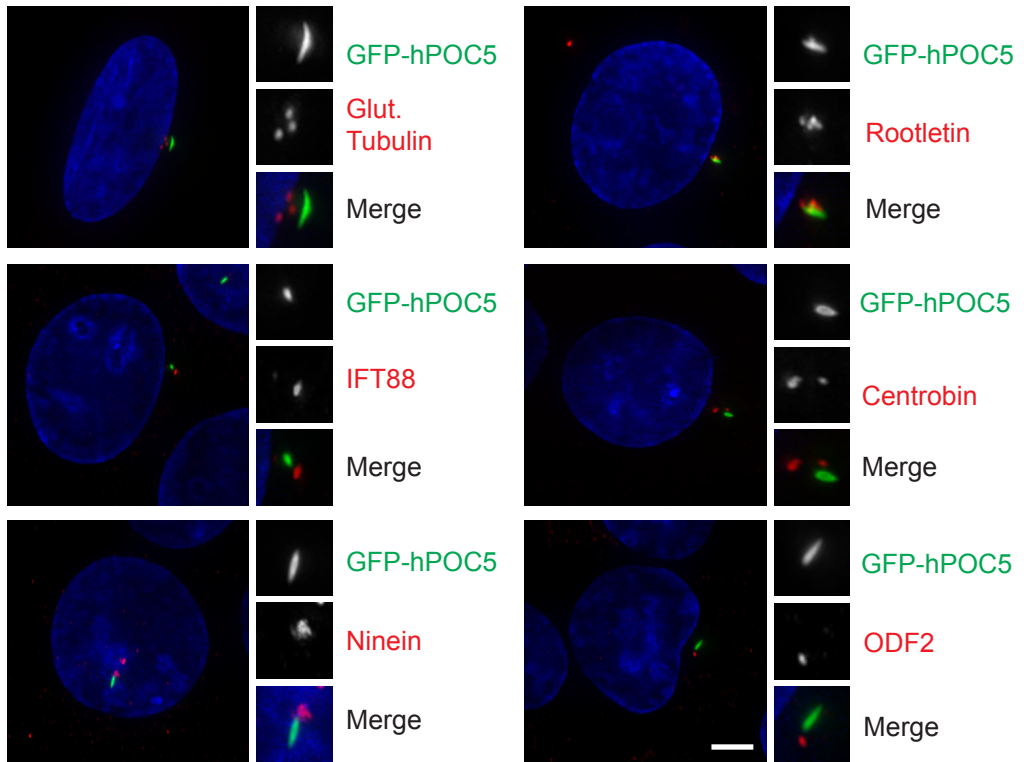

Supplement: pone.0068487.s001.pdf [file pone.0068487.s001.pdf]
